# Supplementary material
Source: PubMed Central journal article supplement (PMC1150853)
Supplement: pnas_0503363102_6.pdf [file pnas_0503363102_6.pdf]

**Table 3. Evidence of peripheral circadian regulated transcripts altered by cAMP**

| Comparison               | Circadian gene list              | Changed | Measured | In List | % changed | % Present | Z Score | P Value |
|--------------------------|----------------------------------|---------|----------|---------|-----------|-----------|---------|---------|
| 2h up and downregulated  |                                  |         |          |         |           |           |         |         |
|                          | Heart Circadian Transcripts (14) | 72      | 345      | 351     | 21        | 98        | 3.7     | 0       |
|                          | Liver Circadian Transcripts (14) | 80      | 426      | 446     | 19        | 96        | 2.9     | 0.009   |
|                          | SCN Circadian Transcripts (13)   | 63      | 343      | 349     | 18        | 98        | 2.4     | 0.017   |
|                          | Liver Circadian Transcripts (13) | 63      | 343      | 349     | 18        | 98        | 2.4     | 0.017   |
| 6 h up and downregulated |                                  |         |          |         |           |           |         |         |
|                          | Heart Circadian Transcripts (14) | 90      | 345      | 351     | 26        | 98        | 4.1     | 0       |
|                          | Liver Circadian Transcripts (14) | 107     | 426      | 446     | 25        | 96        | 4.0     | 0       |
|                          | SCN Circadian Transcripts (13)   | 84      | 343      | 349     | 24        | 98        | 3.3     | 0.001   |
|                          | Liver Circadian Transcripts (13) | 84      | 343      | 349     | 24        | 98        | 3.3     | 0.001   |
| 24h up and downregulated |                                  |         |          |         |           |           |         |         |
|                          | Heart Circadian Transcripts (14) | 128     | 345      | 351     | 37        | 98        | 4.0     | 0       |
|                          | Liver Circadian Transcripts (14) | 150     | 426      | 446     | 35        | 96        | 3.5     | 0.001   |
|                          | SCN Circadian Transcripts (13)   | 119     | 343      | 349     | 35        | 98        | 2.9     | 0.007   |
|                          | Liver Circadian Transcripts (13) | 119     | 343      | 349     | 35        | 98        | 2.9     | 0.007   |

We used the MAPPFINDER program (1) to determine the overlap of PKA responsive transcripts ( $P < 0.06$ , Fold  $>50\%$ ) with previously published circadian regulated transcripts from Storch *et al.* (2) and Panda *et al.* (3). SCN, suprachiasmatic nucleus; Changed, number of PKA responsive genes found in set of peripheral circadian genes; Measured, number of circadian genes in the list represented on the microarray.

1. Doniger, S. W., Salomonis, N., Dahlquist, K. D., Vranizan, K., Lawler, S. C. & Conklin, B. R. (2003) *Genome Biol.* **4**, R7. Available at <http://genomebiology.com/2003/4/1/R7>.
2. Storch, K. F., Lipan, O., Leykin, I., Viswanathan, N., Davis, F. C., Wong, W. H. & Weitz, C. J. (2002) *Nature* **417**, 78-83.
3. Panda, S., Antoch, M. P., Miller, B. H., Su, A. I., Schook, A. B., Straume, M., Schultz, P. G., Kay, S. A., Takahashi, J. S. & Hogenesch, J. B. (2002) *Cell* **109**, 307-320.
