# Supplementary material
Source: PubMed Central journal article supplement (PMC1150853)
Supplement: pnas_0503363102_9.pdf [file pnas_0503363102_9.pdf]

**Table 4. Number of CRE sites within 5 kb of the transcription start site of genes significantly regulated 2 h after cAMP treatment**

| Locus Link | Gene Name                                                                | Gene symbol   | Fold 2h | 2h wt    | Fold 6h | 6h wt    | Fold 24h | 24h wt   | Conserved CRE sites |
|------------|--------------------------------------------------------------------------|---------------|---------|----------|---------|----------|----------|----------|---------------------|
|            |                                                                          |               | wt      | *P value | wt      | *P value | wt       | *P value |                     |
| 73094      | RIKEN cDNA 3110007P09 gene                                               | 3110007P09Rik | 115.9   | 0.029    | 147.4   | 0.029    | 370.8    | 0.029    | 1                   |
| 19735      | regulator of G-protein signaling 2                                       | Rgs2          | 43.7    | 0.029    | 21.8    | 0.029    | 27.0     | 0.029    | 1                   |
| 94222      | oligodendrocyte transcription factor 3                                   | Olig3         | 19.0    | 0.029    | 22.4    | 0.029    | 57.4     | 0.029    | 1                   |
| 19252      | dual specificity phosphatase 1                                           | Dusp1         | 16.3    | 0.029    | 11.5    | 0.029    | 8.1      | 0.029    | 2                   |
| 12508      | CD53 antigen                                                             | Cd53          | 15.9    | 0.029    | 27.5    | 0.029    | 29.6     | 0.029    | 1                   |
| 17872      | myeloid differentiation primary response gene 116                        | Myd116        | 14.2    | 0.029    | 4.4     | 0.029    | 4.4      | 0.029    | 1                   |
| 68728      | RIKEN cDNA 1110029F20 gene                                               | 1110029F20Rik | 10.8    | 0.029    | 12.1    | 0.029    | 8.3      | 0.029    | 1                   |
| 17133      | v-maf musculoaponeurotic fibrosarcoma oncogene family, protein F (avian) | Maff          | 8.4     | 0.029    | 1.2     | 0.057    | -1.1     | 0.600    | 1                   |
| 64213      | suppression of tumorigenicity 7                                          | St7           | 6.8     | 0.029    | 3.7     | 0.029    | 4.0      | 0.029    | 1                   |
| 110521     | human immunodeficiency virus type I enhancer binding protein 1           | Hivep1        | 5.9     | 0.029    | 6.8     | 0.029    | 7.1      | 0.029    | 1                   |
| 14605      | delta sleep inducing peptide, immunoreactor                              | Dsip1         | 4.8     | 0.029    | 2.9     | 0.029    | 1.7      | 0.029    | 1                   |
| 18626      | period homolog 1 (Drosophila)                                            | Per1          | 4.0     | 0.029    | 1.9     | 0.029    | 1.5      | 0.086    | 3                   |
| 80976      | synaptotagmin 13                                                         | Syt13         | 3.9     | 0.029    | 3.5     | 0.029    | 2.2      | 0.029    | 1                   |
| 101497     | expressed sequence AI194308                                              | AI194308      | 3.8     | 0.029    | 6.5     | 0.029    | 5.3      | 0.029    | 1                   |
| 67064      | RIKEN cDNA 2810405I11 gene                                               | 2810405I11Rik | 3.7     | 0.029    | 2.5     | 0.029    | 4.4      | 0.029    | 1                   |
| 20848      | signal transducer and activator of transcription 3                       | Stat3         | 3.7     | 0.029    | 2.4     | 0.029    | 2.5      | 0.029    | 2                   |
| 19073      | proteoglycan, secretory granule                                          | Prg           | 3.6     | 0.029    | 6.6     | 0.029    | 15.9     | 0.029    | 1                   |
| 212398     | frequently rearranged in advanced T-cell lymphomas 2                     | Frat2         | 3.5     | 0.029    | 1.8     | 0.057    | 2.1      | 0.057    | 1                   |
| 22764      | zinc finger protein X-linked                                             | Zfx           | 3.4     | 0.029    | 1.1     | 0.600    | 1.2      | 0.086    | 2                   |
| 11502      | a disintegrin and metalloproteinase domain 9 (meltrin gamma)             | Adam9         | 3.4     | 0.029    | 2.4     | 0.029    | 1.3      | 0.343    | 1                   |
| 108954     | protein phosphatase 1, regulatory (inhibitor) subunit 15b                | Ppp1r15b      | 3.3     | 0.029    | 1.3     | 0.371    | 1.0      | 1.000    | 1                   |
| 319162     | histone 3, H2a                                                           | Hist3h2a      | 3.3     | 0.029    | 1.7     | 0.257    | 3.6      | 0.029    | 1                   |
| 11605      | galactosidase, alpha                                                     | Gla           | 3.1     | 0.029    | 2.1     | 0.029    | 1.2      | 0.571    | 1                   |
| 50790      | acyl-CoA synthetase long-chain family member 4                           | Acs14         | 3.1     | 0.029    | 3.8     | 0.029    | 2.1      | 0.029    | 1                   |
| 12053      | B-cell leukemia/lymphoma 6                                               | Bcl6          | 3.0     | 0.029    | 2.5     | 0.029    | -1.3     | 0.486    | 1                   |
| 15205      | hairy and enhancer of split 1 (Drosophila)                               | Hes1          | 2.9     | 0.029    | 2.2     | 0.029    | 2.5      | 0.029    | 1                   |
| 74182      | RIKEN cDNA 2310032D16 gene                                               | 2310032D16Rik | 2.7     | 0.029    | 2.0     | 0.029    | 1.5      | 0.086    | 1                   |
| 104318     | casein kinase 1, delta                                                   | Csnk1d        | 2.7     | 0.029    | 1.7     | 0.029    | 1.3      | 0.114    | 1                   |
| 66087      | RIKEN cDNA 0610039A15 gene                                               | 0610039A15Rik | 2.7     | 0.029    | 2.3     | 0.029    | 1.6      | 0.029    | 1                   |
| 70561      | RIKEN cDNA 5730420B22 gene                                               | 5730420B22Rik | 2.7     | 0.029    | 3.9     | 0.029    | 3.8      | 0.029    | 1                   |
| 53334      | golgi SNAP receptor complex member 1                                     | Gosr1         | 2.5     | 0.029    | 1.8     | 0.029    | 1.4      | 0.029    | 1                   |
| 15936      | immediate early response 2                                               | Ier2          | 2.5     | 0.029    | 1.4     | 0.029    | 1.4      | 0.057    | 2                   |
| 56812      | DnaJ (Hsp40) homolog, subfamily B, member 10                             | Dnajb10       | 2.4     | 0.029    | 2.5     | 0.029    | 2.2      | 0.057    | 1                   |
| 231655     | 2'-5' oligoadenylate synthetase-like 1                                   | Oasl1         | 2.4     | 0.029    | 1.8     | 0.029    | 1.4      | 0.229    | 1                   |
| 231464     | RIKEN cDNA 4932442K20 gene                                               | 4932442K20Rik | 2.4     | 0.029    | 1.8     | 0.029    | 4.0      | 0.029    | 1                   |
| 22644      | ring finger protein 103                                                  | Rnf103        | 2.4     | 0.029    | 2.7     | 0.029    | 3.8      | 0.029    | 1                   |
| 114716     | sprouty protein with EVH-1 domain 2, related sequence                    | Spred2        | 2.4     | 0.029    | 1.7     | 0.029    | 1.4      | 0.086    | 1                   |
| 72795      | RIKEN cDNA 2810460C24 gene                                               | 2810460C24Rik | 2.4     | 0.029    | 1.6     | 0.029    | -1.0     | 0.657    | 1                   |

| Locus Link | Gene Name                                                           | Gene symbol   | Fold 2h | 2h wt    | Fold 6h | 6h wt    | Fold 24h | 24h wt   | Conserved<br>CRE sites |
|------------|---------------------------------------------------------------------|---------------|---------|----------|---------|----------|----------|----------|------------------------|
|            |                                                                     |               |         | *P value |         | *P value |          | *P value |                        |
| 80795      | selenoprotein K                                                     | Selk          | 2.4     | 0.029    | 2.6     | 0.029    | 1.4      | 0.029    | 1                      |
| 20873      | polo-like kinase 4 (Drosophila)                                     | Plk4          | 2.3     | 0.057    | 1.0     | 0.971    | -2.9     | 0.029    | 1                      |
| 214597     | cDNA sequence BC023957                                              | BC023957      | 2.3     | 0.029    | 2.3     | 0.029    | 3.2      | 0.029    | 1                      |
| 81703      | Jun dimerization protein 2                                          | Jundm2        | 2.2     | 0.029    | 1.8     | 0.057    | 1.9      | 0.029    | 1                      |
| 12226      | B-cell translocation gene 1, anti-proliferative                     | Btg1          | 2.2     | 0.029    | 2.2     | 0.029    | 4.3      | 0.029    | 1                      |
| 66629      | golgi phosphoprotein 3                                              | Golph3        | 2.2     | 0.029    | 1.4     | 0.371    | 1.2      | 0.629    | 1                      |
| 56516      | RNA binding motif, single stranded interacting protein 2            | Rbms2         | 2.2     | 0.029    | 2.9     | 0.029    | 1.7      | 0.057    | 1                      |
| 27399      | inositol hexaphosphate kinase 1                                     | Ihpk1         | 2.2     | 0.029    | 2.0     | 0.029    | 3.3      | 0.029    | 1                      |
| 229096     | RIKEN cDNA 9130022A11 gene                                          | 9130022A11Rik | 2.2     | 0.029    | 1.2     | 0.229    | 1.4      | 0.086    | 2                      |
| 56212      | ras homolog gene family, member G                                   | Rhog          | 2.2     | 0.029    | 2.2     | 0.029    | 1.9      | 0.029    | 1                      |
| 12227      | B-cell translocation gene 2, anti-proliferative                     | Btg2          | 2.1     | 0.029    | 1.5     | 0.057    | 3.4      | 0.029    | 1                      |
| 53892      | protein phosphatase 1D magnesium-dependent, delta isoform           | Ppm1d         | 2.1     | 0.029    | 1.2     | 0.057    | 1.2      | 0.143    | 1                      |
| 17691      | SNF1-like kinase                                                    | Snf1lk        | 2.1     | 0.029    | 1.7     | 0.057    | 2.0      | 0.029    | 3                      |
| 230648     | RIKEN cDNA 4732418C07 gene                                          | 4732418C07Rik | 2.1     | 0.057    | 1.5     | 0.371    | 1.1      | 0.886    | 1                      |
| 12189      | breast cancer 1                                                     | Brca1         | 2.1     | 0.029    | -1.2    | 0.543    | -8.0     | 0.029    | 1                      |
| 20658      | Son cell proliferation protein                                      | Son           | 2.1     | 0.057    | 1.1     | 0.457    | -1.2     | 0.314    | 1                      |
| 56389      | syntaxin 5A                                                         | Stx5a         | 2.1     | 0.029    | 2.3     | 0.029    | 2.3      | 0.029    | 1                      |
| 22057      | transducer of ErbB-2.1                                              | Tob1          | 2.1     | 0.029    | 1.5     | 0.171    | 2.5      | 0.029    | 1                      |
| 20224      | SAR1a gene homolog 1 (S. cerevisiae)                                | Sara1         | 2.1     | 0.029    | 1.8     | 0.029    | -1.3     | 0.029    | 1                      |
| 19820      | ring finger protein 12                                              | Rnf12         | 2.0     | 0.029    | 1.2     | 0.057    | -1.1     | 0.200    | 1                      |
| 18739      | phosphatidylinositol membrane-associated                            | Pitpnm        | 2.0     | 0.029    | 3.0     | 0.029    | 3.0      | 0.029    | 1                      |
| 18701      | phosphatidylinositol glycan, class F                                | Pigf          | 2.0     | 0.029    | 2.0     | 0.029    | -1.1     | 0.114    | 1                      |
| 17966      | neighbor of Brca1 gene 1                                            | Nbr1          | 2.0     | 0.029    | 1.5     | 0.029    | 1.6      | 0.029    | 1                      |
| 67121      | microtubule associated serine/threonine kinase-like                 | Mastl         | 2.0     | 0.029    | 1.2     | 0.086    | -2.7     | 0.057    | 1                      |
| 22210      | ubiquitin-conjugating enzyme E2B, RAD6 homology (S. cerevisiae)     | Ube2b         | 1.9     | 0.029    | 2.2     | 0.029    | 1.6      | 0.029    | 1                      |
| 12177      | BCL2/adenovirus E1B 19kDa-interacting protein 3-like                | Bnip3l        | 1.9     | 0.029    | 2.4     | 0.029    | 2.4      | 0.029    | 1                      |
| 68721      | RIKEN cDNA 1110032A03 gene                                          | 1110032A03Rik | 1.9     | 0.057    | 2.6     | 0.029    | 3.9      | 0.029    | 1                      |
| 22284      | ubiquitin specific protease 9, X chromosome                         | Usp9x         | 1.9     | 0.029    | 1.8     | 0.029    | 1.1      | 0.429    | 1                      |
| 67300      | clathrin, heavy polypeptide (Hc)                                    | Cltc          | 1.8     | 0.029    | 2.0     | 0.029    | 1.2      | 0.400    | 1                      |
| 19084      | protein kinase, cAMP dependent regulatory, type I, alpha            | Prkar1a       | 1.8     | 0.029    | 2.6     | 0.029    | 1.8      | 0.029    | 1                      |
| 22151      | tubulin, beta 2                                                     | Tubb2         | 1.8     | 0.029    | 2.0     | 0.029    | 2.8      | 0.029    | 1                      |
| 66884      | amyloid beta precursor protein (cytoplasmic tail) binding protein 2 | Appbp2        | 1.8     | 0.029    | 1.3     | 0.057    | -1.0     | 0.571    | 1                      |
| 13139      | diacylglycerol kinase, alpha                                        | Dgka          | 1.8     | 0.029    | 3.5     | 0.029    | 9.5      | 0.029    | 1                      |
| 14312      | bromodomain containing 2                                            | Brd2          | 1.8     | 0.029    | 1.1     | 0.114    | -1.2     | 0.029    | 2                      |
| 16911      | LIM domain only 4                                                   | Lmo4          | 1.8     | 0.029    | 2.9     | 0.029    | 3.6      | 0.029    | 1                      |
| 67296      | suppressor of cytokine signaling 4                                  | Socs4         | 1.8     | 0.029    | -1.0    | 1.000    | -2.1     | 0.029    | 1                      |
| 20912      | syntaxin binding protein 3                                          | Stxbp3        | 1.8     | 0.029    | 1.6     | 0.029    | 1.4      | 0.114    | 1                      |
| 14462      | GATA binding protein 3                                              | Gata3         | 1.8     | 0.029    | 2.3     | 0.029    | 3.4      | 0.029    | 1                      |
| 14815      | nuclear receptor subfamily 3, group C, member 1                     | Nr3c1         | 1.7     | 0.029    | 1.8     | 0.029    | 2.8      | 0.029    | 1                      |
| 171508     | cysteine-rich with EGF-like domains 1                               | Creld1        | 1.7     | 0.057    | 1.3     | 0.114    | 1.0      | 0.914    | 1                      |
| 19255      | protein tyrosine phosphatase, non-receptor type 2                   | Ptpn2         | 1.7     | 0.029    | -1.1    | 0.457    | -1.2     | 0.029    | 1                      |
| 56724      | RIKEN cDNA 1200020A08 gene                                          | 1200020A08Rik | 1.7     | 0.029    | 1.8     | 0.029    | 1.5      | 0.029    | 1                      |
| 71340      | RIO kinase 1 (yeast)                                                | Riok1         | 1.7     | 0.029    | 1.9     | 0.029    | 1.3      | 0.057    | 1                      |

| Locus Link | Gene Name                                                                               | Gene symbol   | Fold 2h | 2h wt    | Fold 6h | 6h wt    | Fold 24h | 24h wt   | Conserved<br>CRE sites |
|------------|-----------------------------------------------------------------------------------------|---------------|---------|----------|---------|----------|----------|----------|------------------------|
|            |                                                                                         |               |         | *P value |         | *P value |          | *P value |                        |
| 22381      | WW domain binding protein 5                                                             | Wbp5          | 1.7     | 0.029    | 2.1     | 0.029    | 1.5      | 0.029    | 1                      |
| 83431      | nuclear distribution gene E-like homolog 1 ( <i>A. nidulans</i> )                       | Ndel1         | 1.7     | 0.029    | 1.3     | 0.057    | 1.3      | 0.029    | 1                      |
| 69742      | RIKEN cDNA 2410018G23 gene                                                              | 2410018G23Rik | 1.7     | 0.029    | 1.4     | 0.029    | 1.3      | 0.029    | 1                      |
| 241296     | leucine-rich repeat-containing 8                                                        | Lrrc8         | 1.7     | 0.029    | 1.4     | 0.029    | 1.1      | 0.286    | 1                      |
| 14593      | geranylgeranyl diphosphate synthase 1                                                   | Ggps1         | 1.7     | 0.029    | 1.1     | 0.514    | 1.0      | 0.686    | 1                      |
| 19291      | purine rich element binding protein B                                                   | Purb          | 1.7     | 0.029    | 1.7     | 0.029    | -1.5     | 0.029    | 1                      |
| 13371      | deiodinase, iodothyronine, type II                                                      | Dio2          | 1.6     | 0.029    | 1.5     | 0.286    | -1.0     | 0.914    | 1                      |
| 67581      | RIKEN cDNA 4930451A13 gene                                                              | 4930451A13Rik | 1.6     | 0.029    | 1.7     | 0.114    | 1.2      | 0.200    | 1                      |
| 22682      | zinc finger protein 216                                                                 | Zfp216        | 1.6     | 0.029    | 1.1     | 0.371    | 1.1      | 0.429    | 1                      |
| 73804      | kinesin family member 2C                                                                | Kif2c         | 1.6     | 0.029    | -1.1    | 0.629    | -3.6     | 0.029    | 1                      |
| 71770      | adaptor-related protein complex 2, beta 1 subunit                                       | Ap2b1         | 1.6     | 0.029    | 1.8     | 0.029    | -1.1     | 0.457    | 1                      |
| 28199      | WD repeat domain 23                                                                     | Wdr23         | 1.6     | 0.057    | 2.1     | 0.029    | 1.9      | 0.029    | 1                      |
| 74375      | golgi coiled coil 1                                                                     | Gcc1          | 1.6     | 0.057    | 1.4     | 0.057    | 1.9      | 0.029    | 2                      |
| 211556     | cDNA sequence BC002199                                                                  | BC002199      | 1.6     | 0.029    | 1.5     | 0.029    | 3.3      | 0.029    | 1                      |
| 17261      | myocyte enhancer factor 2D                                                              | Mef2d         | 1.6     | 0.029    | 1.3     | 0.057    | 1.2      | 0.057    | 1                      |
| 56398      | RIKEN cDNA 1500003O03 gene                                                              | 1500003O03Rik | 1.6     | 0.029    | 1.7     | 0.029    | 1.4      | 0.029    | 1                      |
| 16451      | Janus kinase 1                                                                          | Jak1          | 1.6     | 0.029    | 2.0     | 0.029    | 3.4      | 0.029    | 1                      |
| 12283      | calcium binding protein 39                                                              | Cab39         | 1.6     | 0.029    | 1.3     | 0.114    | 1.2      | 0.229    | 1                      |
| 21969      | topoisomerase (DNA) I                                                                   | Top1          | 1.6     | 0.057    | 1.2     | 0.314    | -1.3     | 0.286    | 1                      |
| 28146      | DNA segment, Chr 3, University of California at Los Angeles 1                           | D3Ucla1       | 1.6     | 0.029    | 1.7     | 0.029    | -1.2     | 0.057    | 1                      |
| 22214      | ubiquitin-conjugating enzyme E2H                                                        | Ube2h         | 1.6     | 0.029    | 1.8     | 0.029    | 2.5      | 0.029    | 1                      |
| 50753      | F-box only protein 8                                                                    | Fbxo8         | 1.5     | 0.029    | 1.0     | 0.857    | -1.1     | 0.229    | 1                      |
| 12566      | cyclin-dependent kinase 2                                                               | Cdk2          | 1.5     | 0.029    | 1.1     | 0.400    | -1.5     | 0.029    | 1                      |
| 104360     | insulin related protein 2 (islet 2)                                                     | Isl2          | 1.5     | 0.029    | 1.2     | 0.200    | 1.1      | 0.457    | 1                      |
| 21372      | transducin (beta)-like 1 X-linked                                                       | Tbl1x         | 1.5     | 0.057    | 1.3     | 0.057    | -1.4     | 0.257    | 1                      |
| 19687      | replication factor C 1                                                                  | Recc1         | 1.5     | 0.029    | -1.1    | 0.171    | -1.2     | 0.200    | 1                      |
| 57439      | RIKEN cDNA 1300007B12 gene                                                              | 1300007B12Rik | 1.5     | 0.029    | 1.2     | 0.086    | -1.4     | 0.029    | 1                      |
| 67849      | RIKEN cDNA 2610036L13 gene                                                              | 2610036L13Rik | 1.5     | 0.029    | -1.1    | 0.029    | -4.1     | 0.029    | 1                      |
| 52708      | DNA segment, Chr 12, ERATO Doi 748, expressed                                           | D12Erd748e    | 1.5     | 0.029    | 1.2     | 0.229    | 1.1      | 0.114    | 1                      |
| 23806      | ariadne ubiquitin-conjugating enzyme E2 binding protein homolog 1 ( <i>DrosoArih1</i> ) |               | 1.5     | 0.029    | 1.1     | 0.514    | -1.1     | 0.457    | 1                      |
| 66603      | survivor of motor neuron protein interacting protein 1                                  | Sip1          | -1.6    | 0.057    | -1.7    | 0.029    | -2.9     | 0.029    | 1                      |
| 21379      | transforming growth factor beta regulated gene 4                                        | Tbrg4         | -1.6    | 0.029    | -2.9    | 0.029    | -2.6     | 0.029    | 1                      |
| 233875     | expressed sequence AI225782                                                             | AI225782      | -1.6    | 0.029    | -1.4    | 0.029    | -1.7     | 0.029    | 1                      |
| 12488      | CD2-associated protein                                                                  | Cd2ap         | -1.6    | 0.057    | -1.2    | 0.086    | -1.1     | 0.457    | 1                      |
| 67561      | RIKEN cDNA 8430408H12 gene                                                              | 8430408H12Rik | -1.6    | 0.029    | 1.1     | 0.143    | -1.2     | 0.114    | 1                      |
| 58220      | par-6 (partitioning defective 6) homolog beta ( <i>C. elegans</i> )                     | Pard6b        | -1.6    | 0.029    | -1.4    | 0.029    | 1.1      | 0.229    | 1                      |
| 66587      | Fas-activated serine/threonine kinase                                                   | Fastk         | -1.6    | 0.029    | -1.6    | 0.029    | -1.4     | 0.029    | 1                      |
| 70047      | tRNA nucleotidyl transferase, CCA-adding, 1                                             | Trnt1         | -1.6    | 0.029    | -1.9    | 0.029    | -2.0     | 0.029    | 1                      |
| 101612     | glutamate-rich WD repeat containing 1                                                   | Grwd1         | -1.6    | 0.057    | -2.6    | 0.029    | -3.2     | 0.029    | 1                      |
| 14455      | growth arrest specific 5                                                                | Gas5          | -1.6    | 0.029    | -4.2    | 0.029    | -4.1     | 0.029    | 1                      |
| 67095      | RIKEN cDNA 2310001H13 gene                                                              | 2310001H13Rik | -1.7    | 0.029    | 1.1     | 0.057    | 1.2      | 0.029    | 1                      |
| 52906      | Abelson helper integration site                                                         | Ahi1          | -1.7    | 0.029    | -1.6    | 0.029    | -1.3     | 0.029    | 1                      |
| 12499      | ectonucleoside triphosphate diphosphohydrolase 5                                        | Entpd5        | -1.7    | 0.057    | -1.5    | 0.086    | 1.2      | 0.200    | 1                      |

| Locus Link | Gene Name                                                     | Gene symbol   | Fold 2h | 2h wt    | Fold 6h | 6h wt    | Fold 24h | 24h wt   | Conserved<br>CRE sites |
|------------|---------------------------------------------------------------|---------------|---------|----------|---------|----------|----------|----------|------------------------|
|            |                                                               |               | wt      | *P value | wt      | *P value | wt       | *P value |                        |
| 74164      | nuclear transcription factor, X-box binding 1                 | Nfx1          | -1.7    | 0.029    | -1.7    | 0.029    | 1.2      | 0.086    | 1                      |
| 27643      | ubiquitin-like 4                                              | Ubl4          | -1.7    | 0.029    | -1.4    | 0.029    | -1.3     | 0.029    | 1                      |
| 20606      | somatostatin receptor 2                                       | Sstr2         | -1.8    | 0.029    | -1.6    | 0.029    | -2.5     | 0.029    | 1                      |
| 170719     | oxidation resistance 1                                        | Oxr1          | -1.8    | 0.057    | 1.2     | 0.543    | 1.6      | 0.143    | 1                      |
| 67870      | RIKEN cDNA 2310057D15 gene                                    | 2310057D15Rik | -1.8    | 0.029    | -2.2    | 0.029    | -2.8     | 0.029    | 1                      |
| 216549     | RIKEN cDNA 9130023F12 gene                                    | 9130023F12Rik | -1.8    | 0.029    | 1.3     | 0.057    | 1.1      | 0.086    | 1                      |
| 72400      | PIN2/TRF1-interacting protein                                 | Pinx1         | -1.8    | 0.029    | -2.5    | 0.029    | -2.5     | 0.029    | 1                      |
| 104662     | expressed sequence AW550801                                   | AW550801      | -1.8    | 0.029    | -2.5    | 0.029    | -2.1     | 0.029    | 2                      |
| 68449      | RIKEN cDNA 1110003P22 gene                                    | 1110003P22Rik | -1.8    | 0.029    | -1.9    | 0.029    | -2.3     | 0.029    | 1                      |
| 330836     | expressed sequence AI643885                                   | AI643885      | -1.8    | 0.029    | -1.5    | 0.029    | -1.5     | 0.057    | 1                      |
| 68092      | nuclear cap binding protein subunit 2                         | Ncbp2         | -1.9    | 0.029    | -1.5    | 0.057    | -1.2     | 0.143    | 1                      |
| 101612     | glutamate-rich WD repeat containing 1                         | Grwd1         | -1.9    | 0.029    | -4.0    | 0.029    | -4.7     | 0.029    | 1                      |
| 68040      | RIKEN cDNA 3110024A21 gene                                    | 3110024A21Rik | -1.9    | 0.057    | -2.0    | 0.029    | -1.5     | 0.314    | 1                      |
| 22632      | YY1 transcription factor                                      | Yy1           | -1.9    | 0.029    | -1.1    | 0.629    | 1.1      | 0.143    | 1                      |
| 13684      | eukaryotic translation initiation factor 4E                   | Eif4e         | -2.0    | 0.029    | -2.2    | 0.029    | -2.5     | 0.029    | 1                      |
| 66973      | mitochondrial ribosomal protein S18B                          | Mrps18b       | -2.0    | 0.029    | -2.3    | 0.029    | -2.7     | 0.029    | 1                      |
| 19206      | patched homolog 1                                             | Ptch1         | -2.0    | 0.057    | -1.0    | 0.943    | -1.4     | 0.086    | 1                      |
| 50926      | heterogeneous nuclear ribonucleoprotein D-like                | Hnrpdl        | -2.0    | 0.029    | -3.2    | 0.029    | -2.7     | 0.029    | 1                      |
| 67053      | ribonuclease P 14kDa subunit (human)                          | Rpp14         | -2.1    | 0.029    | -2.0    | 0.029    | -1.9     | 0.057    | 1                      |
| 103737     | peroxisomal biogenesis factor 12                              | Pex12         | -2.2    | 0.029    | -1.5    | 0.057    | -1.0     | 0.971    | 1                      |
| 13537      | dual specificity phosphatase 2                                | Dusp2         | -2.2    | 0.029    | -1.1    | 0.686    | 1.4      | 0.171    | 1                      |
| 108673     | DNA segment, Chr 19, ERATO Doi 678, expressed                 | D19Erd678e    | -2.3    | 0.029    | -3.3    | 0.029    | -3.6     | 0.029    | 1                      |
| 56207      | ubiquitin carboxyl-terminal esterase L5                       | Uchl5         | -2.3    | 0.029    | -3.1    | 0.029    | -5.1     | 0.029    | 1                      |
| 20383      | splicing factor, arginine/serine-rich 3 (SRp20)               | Sfrs3         | -2.4    | 0.029    | -2.6    | 0.029    | -2.9     | 0.029    | 1                      |
| 12068      | blocked early in transport 1 homolog ( <i>S. cerevisiae</i> ) | Bet1          | -2.5    | 0.057    | 1.6     | 0.200    | 1.2      | 0.343    | 1                      |
| 19272      | protein tyrosine phosphatase, receptor type, K                | Ptprk         | -2.5    | 0.029    | -3.9    | 0.029    | -3.6     | 0.029    | 1                      |
| 67712      | mitochondrial solute carrier protein                          | Mscp          | -2.7    | 0.029    | -2.0    | 0.029    | -1.6     | 0.029    | 1                      |
| 58208      | B-cell leukemia/lymphoma 11B                                  | Bcl11b        | -3.9    | 0.029    | -3.1    | 0.029    | -2.1     | 0.029    | 1                      |

\**P* value, permuted *P* value.

Locus Link IDs were used to determine the genomic loci of all genes on our microarray. Five-kb upstream regions from each mouse transcriptional start along with orthologous human sequence were extracted from the whole genome alignment of rat, mouse, and human (1). CRE sites were determined with the rVista program (2) based on TRANSFAC Professional 7.4 library (3) to identify CRE (TRANSFAC matrix ID-V\$CREB\_01) sites in each of the aligned sequences, and determined which of the predicted sites are aligned and conserved between the species in the alignment. Conserved-total number of CRE sites aligned between human and mouse within 21-bp window of >80% conservation (2).

1. Zambon, A. C., McDearmon, E. L., Salomonis, N., Vranizan, K. M., Johansen, K. L., Adey, D., Takahashi, J. S., Schambelan, M. & Conklin, B. R. (2003) *Genome Biol.* **4**, R61.
2. Conkright, M. D., Guzman, E., Flechner, L., Su, A. I., Hogenesch, J. B. & Montminy, M. (2003) *Mol. Cell.* **11**, 1101-1108.
3. Joshi-Tope, G., Vastrik, I., Gopinathrao, G., Matthews, L., Schmidt, E., Gillespie, M., D'Eustachio, P., Jassal, B., Lewis, S., Wu, G., *et al.* (2003) *Cold Spring Harbor Symp. Quant. Biol.* **68**, 237-243.
