# Supplementary material
Source: PubMed Central journal article supplement (PMC1150853)

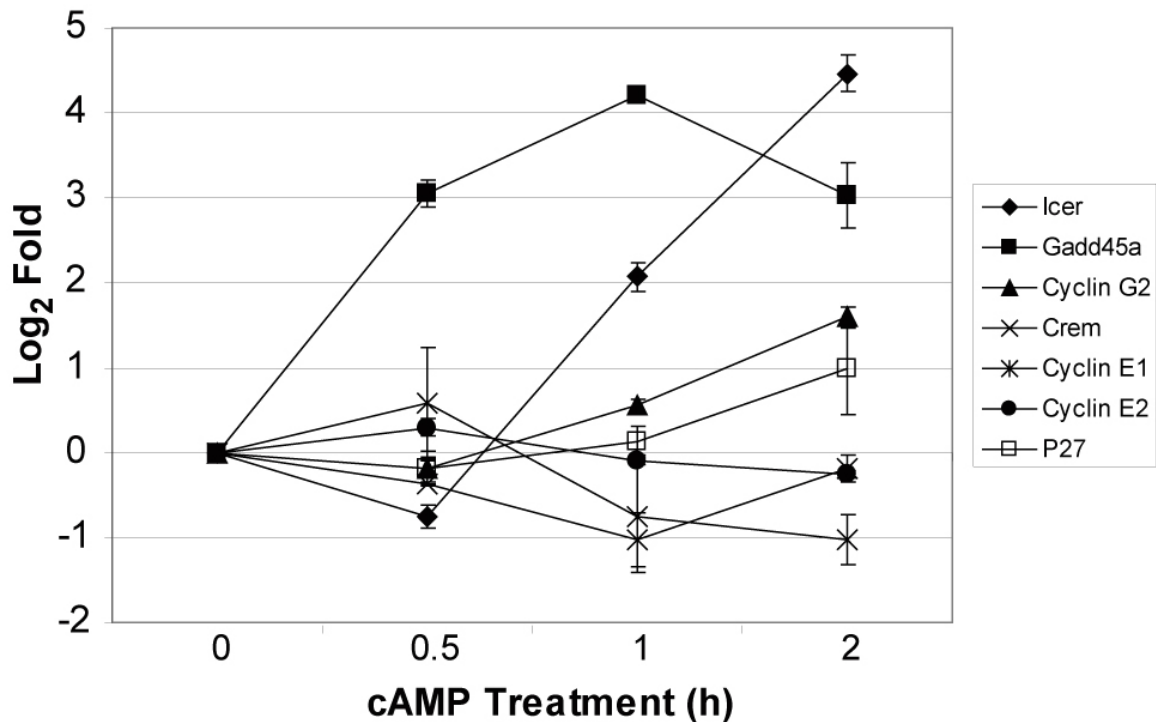

Supplement: pnas_0503363102_11.pdf [file pnas_0503363102_11.pdf]

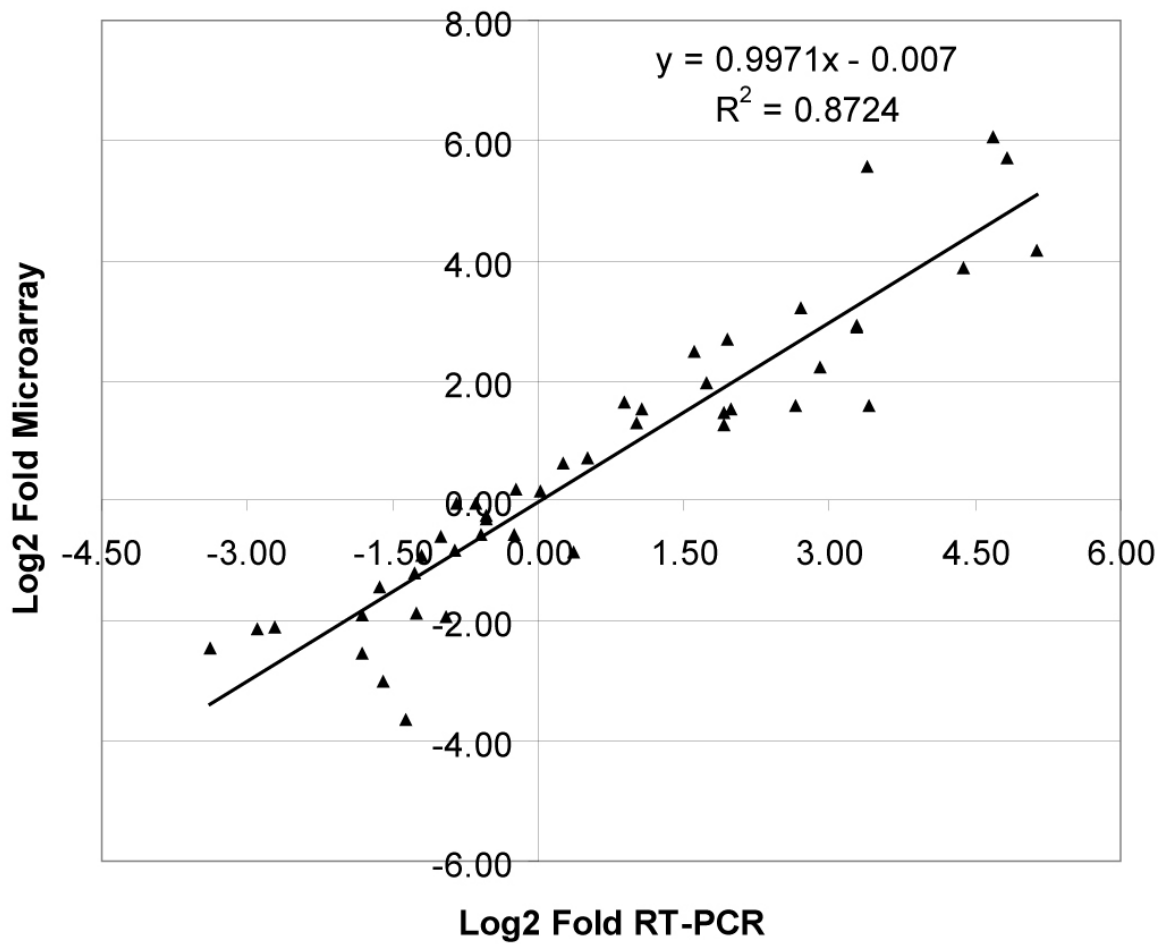

Supplement: pnas_0503363102_2.pdf [file pnas_0503363102_2.pdf]

**A**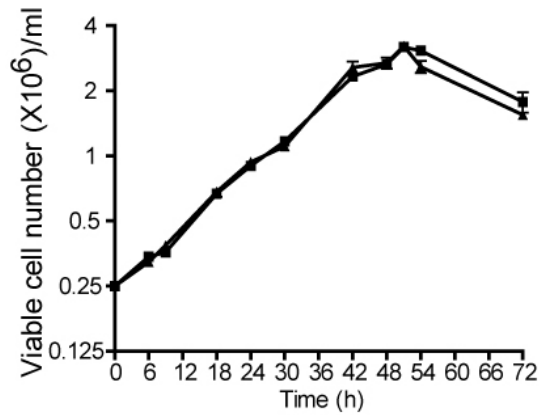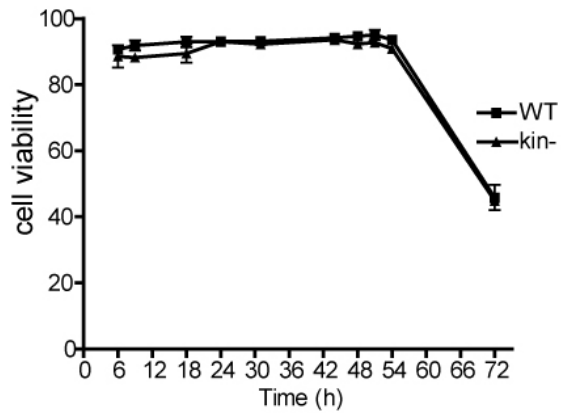**B**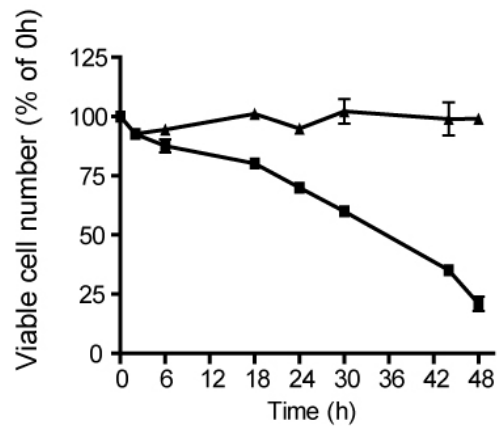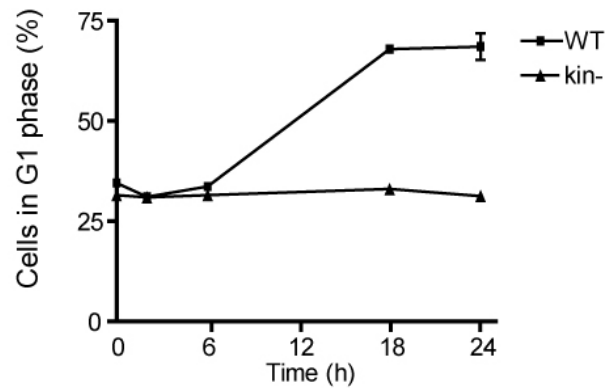

Supplement: pnas_0503363102_4.pdf [file pnas_0503363102_4.pdf]

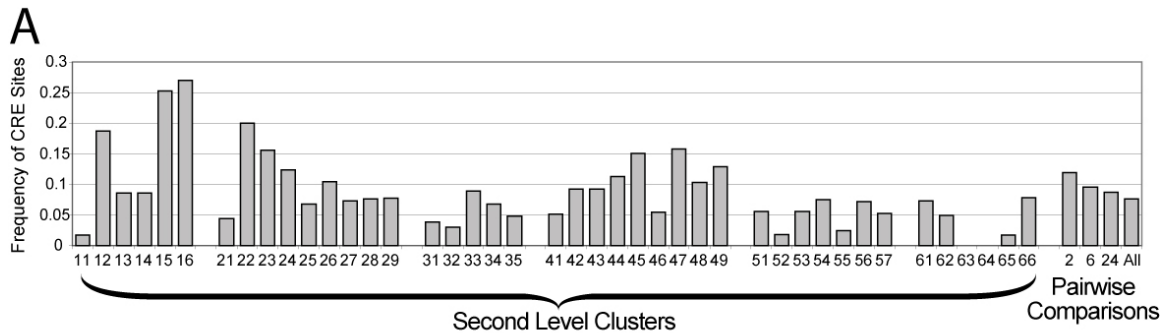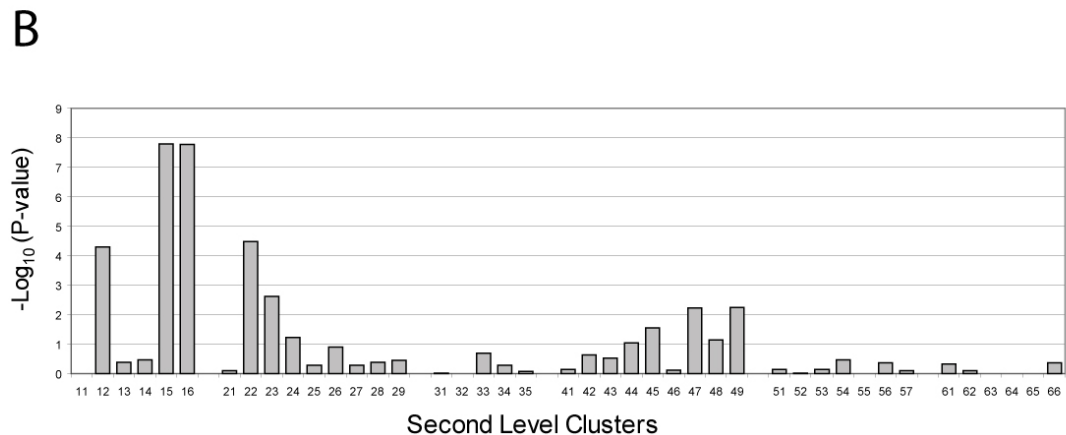

Supplement: pnas_0503363102_7.pdf [file pnas_0503363102_7.pdf]

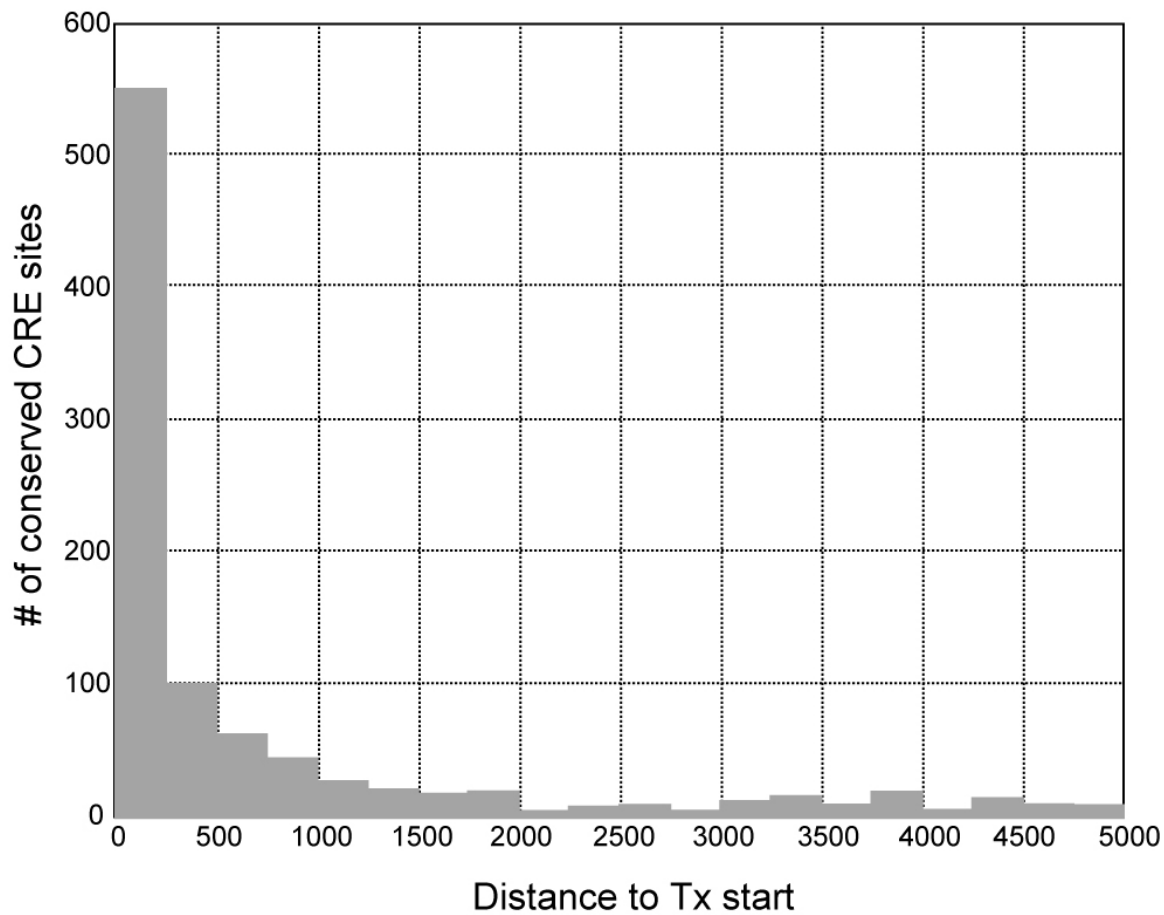

Supplement: pnas_0503363102_8.pdf [file pnas_0503363102_8.pdf]
